# Supplementary material
Source: PubMed Central journal article supplement (PMC4558270)
Supplement: NIHMS704261-supplement-Supplementary_Materials.pdf [file NIHMS704261-supplement-Supplementary_Materials.pdf]

## Supporting Information

### Substantial differentiation of human neural stem cells into motor neurons on biomimetic polyurea

Donghwa Yun<sup>+</sup>, Young M. Lee<sup>+</sup>, Melissa R Laughter<sup>+</sup>, Curt R. Freed, Daewon Park\*

+ These authors contributed equally to this work

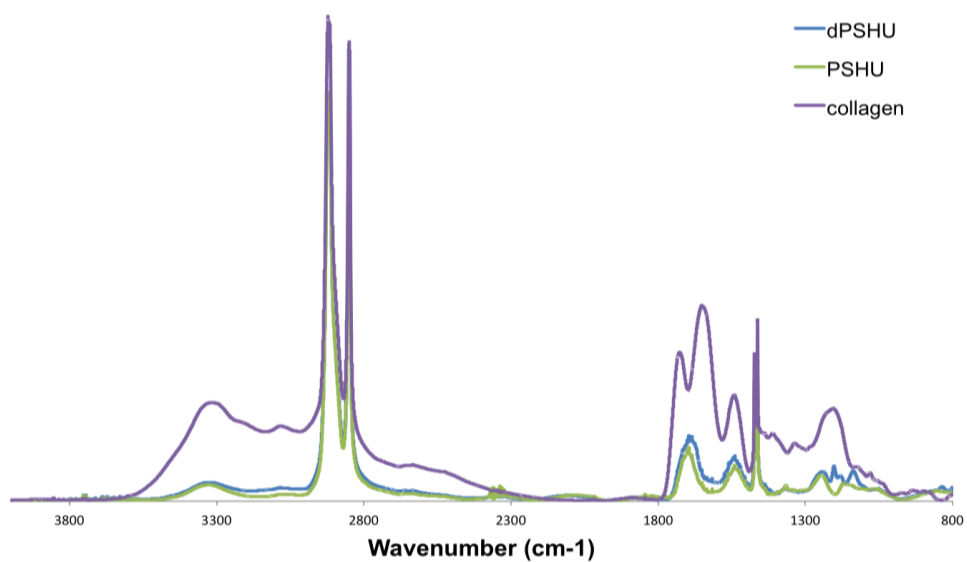

Figure S1. FT-IR of dPSHU (blue), PSHU (green), and collagen (purple).

**Characterizations:** We began by confirming and characterizing the synthesis process of Poly (serinol hexamethylene urea). NMR and FT-IR were both used to confirm the overall polymer structure and to detect any remaining BOC-protecting groups. NMR analysis was able to show complete deprotection of the BOC-protecting groups from the PSHU backbone as well as the expected polymer structure. The NMR analysis of the polymer structure can be seen in **Figure S2**. The NMR spectrum of PSHU confirmed the expected copolymer structure, with peaks at 1.3 (–CH<sub>2</sub>–), 1.5 (–NH–CH<sub>2</sub>–CH<sub>2</sub>–), and 3.2 (–NH–CH<sub>2</sub>–) associated with HDI, at 1.4 (–C–(CH<sub>3</sub>)<sub>3</sub>), and 4.1 (–CH–NH–) associated with N-BOC-serinol. You can see in the NMR spectrum that the deprotected PSHU does not show a peak at 4.1 confirming the removal of the N-BOC-serinol groups (**Figure S3**).

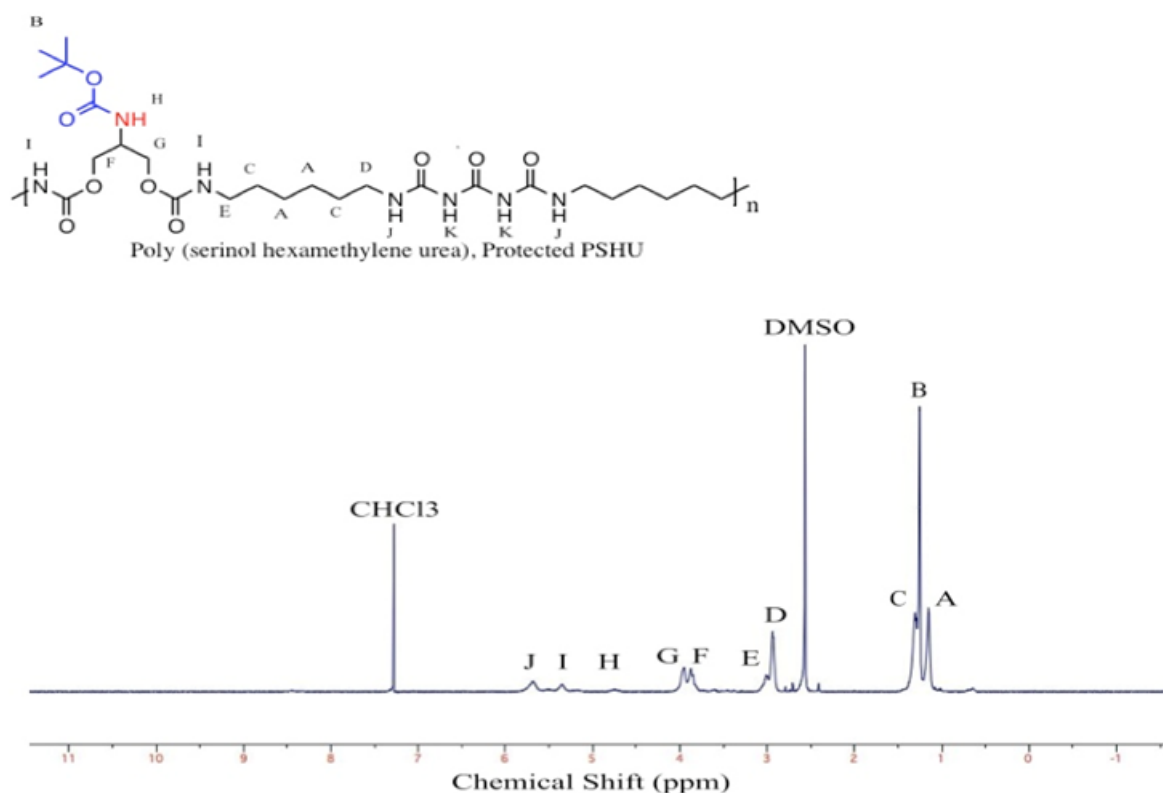

**Figure S2.** <sup>1</sup>H NMR (500 MHz, CDCl<sub>3</sub>) spectrum of PSHU to confirm overall structure of polymer chain.

### Removal of BOC Groups

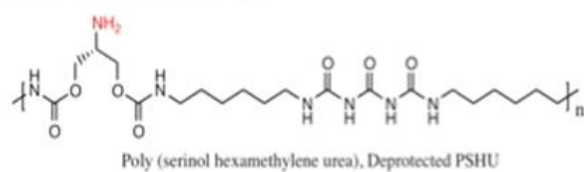

### Disappearance of peak at 1.4

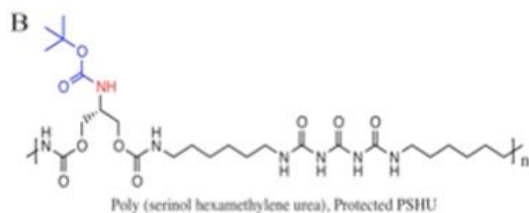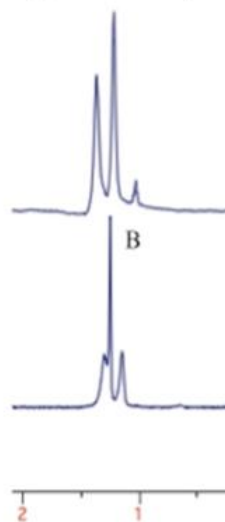

Figure S3. <sup>1</sup>H NMR (500 MHz, CDCl<sub>3</sub>) spectrum of PSHU and deprotected PSHU to confirm removal of the BOC protecting groups during deprotection process.

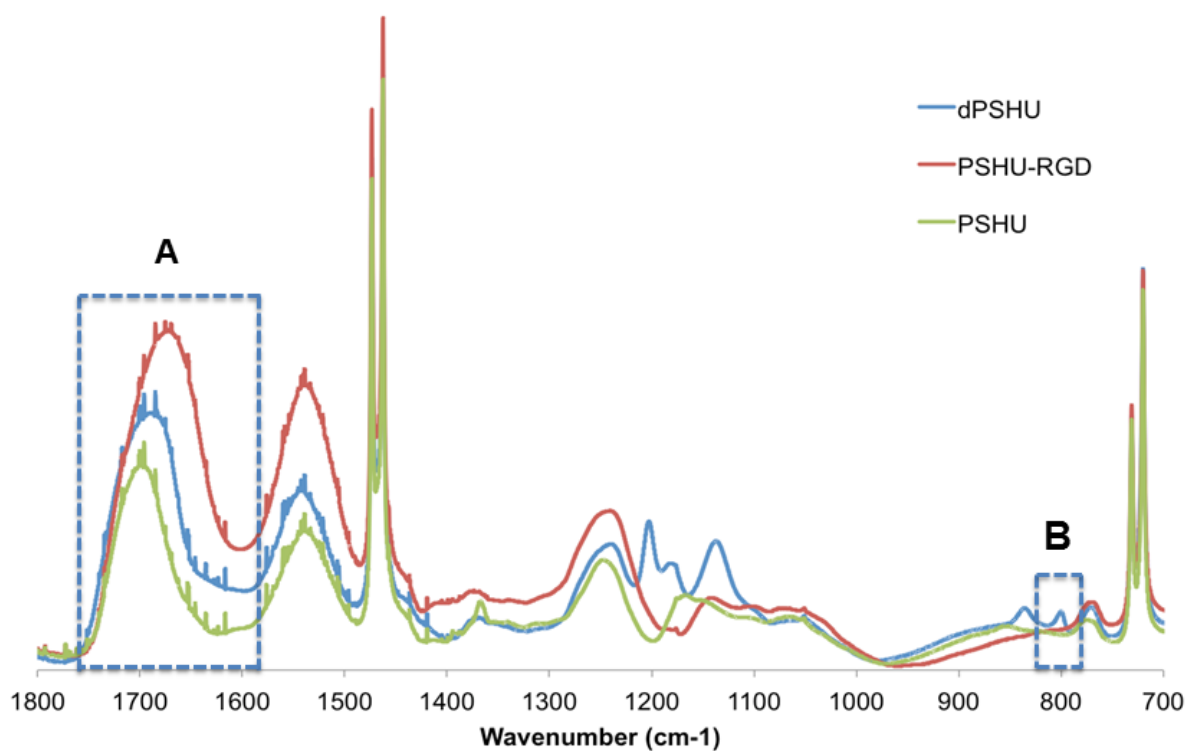

Figure S4. FT-IR of dPSHU, PSHU, and PSHU-RGD. Confirmation of free amine groups on dPSHU after deprotection (B). Shift in carbonyl absorbance to confirm attachment of RGD to the polymer backbone (A).

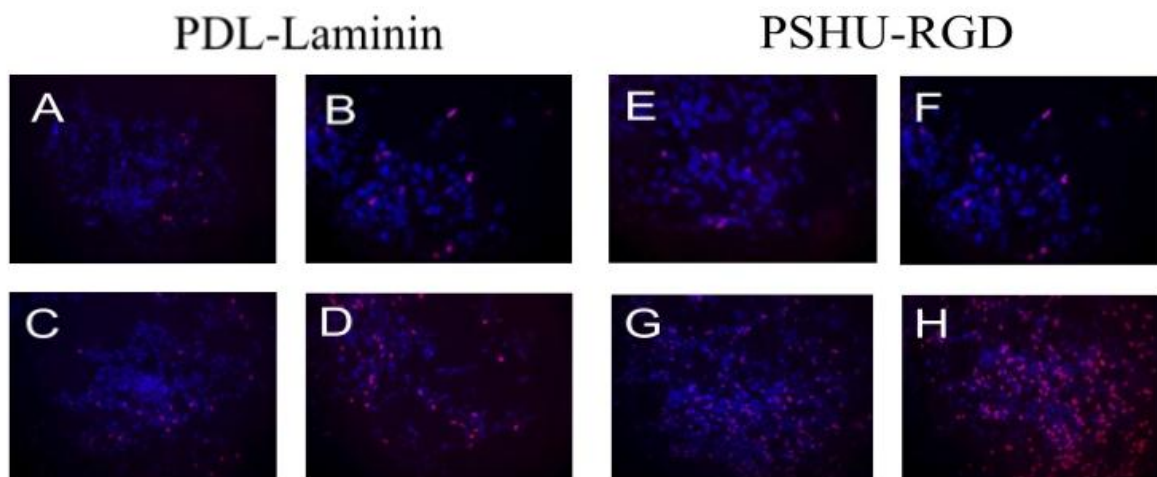

*Figure S5.* Fluorescent microscopy images of hNSCs cultured on PDL-Laminin(**A-D**) and PSHU-RGD (**E-H**). After culture for 14 days (**A,B,E,F**) and 21 days (**C,D,G,H**), cells were stained with Hoechst 3342 and HB9+ (**A,C,E,G**), and Hoechst 3342 and Isl1+ (**B,D,F,H**). Red dots indicate HB9+ and Isl1+ cells while blue dots indicate Hoechst 3342. These images were used to perform quantitative analysis comparing the ratio of cells expressing Isl1 and HB9 (Figure 4).

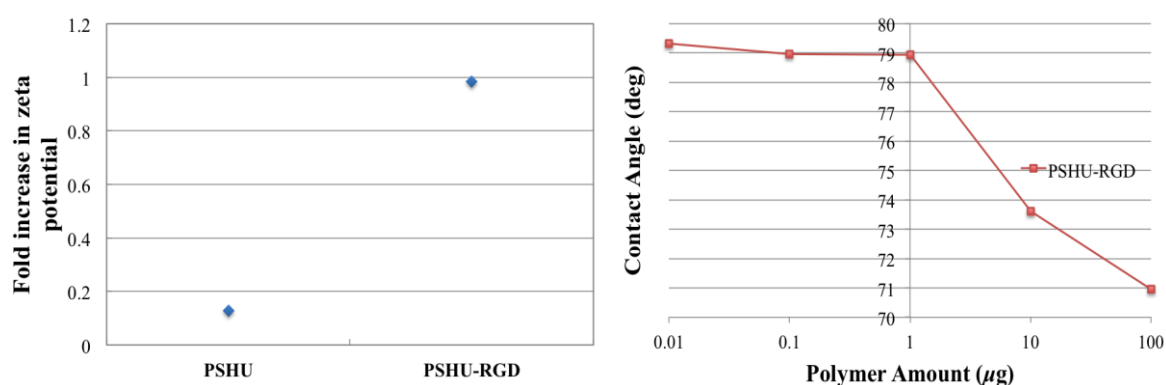

*Figure S6.* Left: Zeta potential measurements normalized to PSHU show an increase in charge with PSHU-RGD when compared to PSHU. Right: Contact angle shows an increase in hydrophilicity as the amount of PSHU-RGD is increase.

$$(1 \mu\text{g PSHU} - \text{RGD}) * \left(\frac{1 \text{ mole}}{9600 \text{ g}}\right) * \left(\frac{18 \text{ moles NH}_2}{1 \text{ mole PSHU} - \text{RGD}}\right) * \left(\frac{6.022e + 23 \text{ molecules}}{1 \text{ mole}}\right)$$

$$=1.12931e+15 \text{ RGD Biomolecules}$$

$$(4.5 \mu\text{g Laminin}) * \left(\frac{1 \text{ mole}}{400000 \text{ g}}\right) * \left(\frac{6.022e + 23 \text{ molecules}}{1 \text{ mole}}\right)$$

$$=6.77621e+12 \text{ RGD Biomolecules}$$

*Equation S1.* Calculations to determine theoretical density of integrin binding RGD biomolecules. 1  $\mu\text{g}$  of PSHU-RGD coating possesses  $\sim 1e+15$  RGD biomolecules whereas 4.5  $\mu\text{g}$  of PDL-Laminin coating possesses  $\sim 6e+12$  RGD biomolecules.
